# Supplementary material
Source: PubMed Central journal article supplement (PMC4291737)

## Synthesis and Biological Evaluation of Pyrazolo[1,5-a]Pyrimidine Compounds as Potent and Selective Pim-1 Inhibitors.

Yong Xu,\* Benjamin G. Brenning, Steven G. Kultgen, Jason M. Foulks, Adrienne Clifford, Shuping Lai, Ashley Chan, Shannon Merx, Michael V. McCullar, Steven B. Kanner and Koc-Kan Ho

*Astex Pharmaceuticals, Inc., 4140 Dublin Boulevard, Suite 200, Dublin, CA 94568 U.S.A.  
Fax: 925-560-0101; Email: yxu22@hotmail.com*

Supplementary material:

**1. Chemistry.** General. NMR spectra were performed on a Varian-400 (<sup>1</sup>H, 400 MHz; <sup>13</sup>C, 100 MHz), chemical shifts  $\delta$  are in ppm, and the following abbreviations are used: singlet (s), doublet (d), triplet (t), quadruplet (q), doublet of doublet (dd), multiplet (m), broad (br). Mass spectra (ESI) were determined on a Waters LCMS MicromassZQ apparatus. Chromatographic purifications were performed by Teledyn Combiflash Rf chromatography. Reactions were monitored by TLC using fluorescent silica gel plates (60 F254 from Merck) or Waters LCMS MicromassZQ apparatus. The purity of all tested compounds was established to be >96% by Waters LCMS MicromassZQ apparatus.

4-((3-(3-(Trifluoromethoxy)phenyl)pyrazolo[1,5-a]pyrimidin-5-yl)amino) -*trans*-cyclohexanol (**9**).

Synthesis of 3-(dimethylamino)-2-(3-(trifluoromethoxy)phenyl)acrylonitrile.

A mixture of 3-trifluoromethoxyphenylacetonitrile (2.5 grams, 12.43 mmol), DIPEA (0.321 grams, 2.48 mmol), and dimethyl formamide dimethyl acetal (20 mL) were heated at reflux for 4 h. On cooling, the reaction was partitioned between EtOAc and saturated aqueous NH<sub>4</sub>Cl solution. The aqueous phase was extracted with ethyl acetate and the combined organic phase washed with brine and concentrated in vacuo. The crude product was purified by using Combiflash chromatography (ethyl acetate/hexane, 0-10%) on silica gel (24 grams) to give pure product (2.3 grams, 8.98 mmol, 72% yield.).

Synthesis of 4-(3-(trifluoromethoxy)phenyl)-1*H*-pyrazol-5-amine.

A mixture of acrylnitrile (2.0 g, 7.81 mmol), hydrazine hydrate (4.53 grams, 39.0 mmol), and glacial acetic acid (2.34 grams, 39.0 mmol) and ethanol (20 mL) were heated at reflux for 16 h. On cooling, the reaction was diluted with water, extracted with AcOEt and the combined organic phases were washed with brine and concentrated in vacuo (1.90 grams, 7.84 mmol, 100% yield.). <sup>1</sup>H-NMR (CDCl<sub>3</sub>/400 MHz): δ 7.64 (m, 1H), 7.42 (m, 4H), 7.06 (d, *J* = 7.6 Hz, 1H). MS (ES<sup>+</sup>, *m/z*): (M+H)<sup>+</sup>: 244.3.

Synthesis of 3-(3-(trifluoromethoxy)phenyl)pyrazolo[1,5-*a*]pyrimidin-5(4*H*)-one.

A mixture of pyrazole (0.8 grams, 3.29 mmol), 1,3-dimethyluracil (0.51 grams, 3.62 mmol), and dry EtOH 10 mL were treated dropwise with sodium ethoxide (0.29 grams, 4.28 mmol) and on completion of addition the reaction was heated at reflux for 16 h. On cooling the reaction was concentrated in vacuo and the residue added to ice, neutralized with acetic acid and the resulting precipitate filtered, washed with water and dried to give the product (0.4 grams, 1.36 mmol, 41% yield.). No chromatography was needed for this step. <sup>1</sup>H-NMR (CDCl<sub>3</sub>/400 MHz): δ 8.42 (d, *J* = 8.0 Hz, 1H), 8.09 (s, 1H), 7.62 (d, *J* = 7.6 Hz, 1H), 7.52 (m, 2H), 7.20 (d, *J* = 8.8 Hz, 1H), 6.16 (d, *J* = 7.6 Hz, 1H).

Synthesis of 5-chloro-3-(3-(trifluoromethoxy)phenyl)pyrazolo[1,5-*a*]pyrimidine.

A mixture of pyrazolepyrimidinone (0.5 grams, 1.69 mmol) was treated with POCl<sub>3</sub> 10 mL and the mixture was heated at reflux for overnight. On cooling, after removing the solvent under rotovapor, the reaction was poured onto ice, cautiously made basic with saturated aqueous NaHCO<sub>3</sub> solution and extracted with EtOAc. The combined organic phases were washed with brine and concentrated in vacuo to give the product (0.3 grams, 0.96 mmol, 56% yield.). <sup>1</sup>H-NMR (CDCl<sub>3</sub>/400 MHz): δ 8.56 (d, *J* = 7.6 Hz, 1H), 8.39 (s, 1H), 7.92 (d, *J* = 7.6 Hz, 1H), 7.85 (m, 2H), 7.45 (t, *J* = 8.0 Hz, 1H), 7.12 (d, *J* = 8.4 Hz, 1H), 6.85 (d, *J* = 7.2 Hz, 1H). MS (ES<sup>+</sup>, *m/z*): (M+H)<sup>+</sup>: 314.3.

Synthesis of 4-((3-(3-(trifluoromethoxy)phenyl)pyrazolo[1,5-*a*]pyrimidin-5-yl)amino)cyclohexanol.

A solution of 5-chloro-3-(3-(trifluoromethoxy)phenyl)pyrazolo[1,5-*a*]pyrimidine (0.03 grams, 0.096 mmol) and *trans*-4-aminocyclohexanol (0.017 grams, 0.143 mmol) in iso-propanol (5 mL) was added DIPEA (0.025 grams, 0.191 mmol) and the mixture was heated at 150°C for 12 h under microwave irradiation. The resulting dark brown solution was cooled down and was

concentrated under reduced pressure. The solid was further purified by using combiflash chromatography (12 g column), eluent: 0-6% CH<sub>3</sub>OH/DCM and obtained product (0.020 grams, 0.051 mmol, 53% yield.). <sup>1</sup>H-NMR (CD<sub>3</sub>OD/400 MHz): δ 8.22 (s, 1H), 8.18 (m, 2H), 7.80 (d, *J* = 8.0 Hz, 1H), 7.34 (t, *J* = 8.4 Hz, 1H), 6.96 (m, 1H), 6.17 (d, *J* = 7.6 Hz, 1H), 3.90 (m, 1H), 3.58 (m, 1H), 2.18 (m, 2H), 2.00 (m, 2H), 1.38 (m, 4H). MS (ES<sup>+</sup>, *m/z*): (M+H)<sup>+</sup>: 393.5. LC-MS purity of compound **9** was found to be >96%.

Compounds **10-14** were prepared using similar procedures as in compound **9**.

1-Methyl-4-((3-(3-(trifluoromethoxy)phenyl)pyrazolo[1,5-a]pyrimidin-5-yl)amino) -*trans*-cyclohexanol (**10**).

A solution of 5-chloro-3-(3-(trifluoromethoxy)phenyl)pyrazolo[1,5-a]pyrimidine (0.2 grams, 0.638 mmol) and *trans*-4-amino-1-methylcyclohexanol (0.115 grams, 0.893 mmol) in isopropanol (5 mL) was added DIPEA (0.165 grams, 1.275 mmol) and the mixture was heated at 150°C for 12 h under microwave irradiation. The resulting dark brown solution was cooled down and was concentrated under reduced pressure. The solid was further purified by using combiflash chromatography (12 g column), eluent: 0-6% CH<sub>3</sub>OH/DCM and obtained product (0.120 grams, 0.295 mmol, 46% yield.). <sup>1</sup>H-NMR (CD<sub>3</sub>OD/400 MHz): δ 8.25 (m, 3H), 7.95 (d, *J* = 8.0 Hz, 1H), 7.40 (t, *J* = 8.0 Hz, 1H), 6.99 (d, *J* = 7.6 Hz, 1H), 6.29 (d, *J* = 7.6 Hz, 1H), 4.10 (m, 1H), 2.11 (m, 2H), 1.74 (m, 2H), 1.62 (m, 4H), 1.28 (s, 3H). MS (ES<sup>+</sup>, *m/z*): (M+H)<sup>+</sup>: 407.5. LC-MS purity of compound **10** was found to be >96%.

4-((3-(3-(Trifluoromethoxy)phenyl)pyrazolo[1,5-a]pyrimidin-5-yl)amino) -*trans*-cyclohexylpropan-2-ol (**11**).

A solution of 5-chloro-3-(3-(trifluoromethoxy)phenyl)pyrazolo[1,5-a]pyrimidine (0.2 grams, 0.638 mmol) and *trans*-4-aminocyclohexylpropan-2-ol (0.10 grams, 0.638 mmol) in isopropanol (5 mL) was added DIPEA (0.165 grams, 1.275 mmol) and the mixture was heated at 150°C for 12 h under microwave irradiation. The resulting dark brown solution was cooled down and was concentrated under reduced pressure. The solid was further purified by using combiflash chromatography (12 g column), eluent: 0-6% CH<sub>3</sub>OH/DCM and obtained product (0.140 grams, 0.322 mmol, 51% yield.). <sup>1</sup>H-NMR (CD<sub>3</sub>OD/400 MHz): δ 8.38 (s, 1H), 8.22 (m, 2H), 7.78 (d, *J* = 8.0 Hz, 1H), 7.38 (t, *J* = 8.0 Hz, 1H), 6.97 (d, *J* = 7.6 Hz, 1H), 6.22 (d, *J* = 7.6 Hz, 1H), 3.90 (m, 1H), 2.25 (m, 2H), 1.97 (m, 2H), 2.00 (m, 2H), 1.37 (m, 1H), 1.30 (m, 4H), 1.16 (s, 6H). MS (ES<sup>+</sup>, *m/z*): (M+H)<sup>+</sup>: 435 .5. LC-MS purity of compound **11** was found to be >96%.

4-(*trans*-Methoxycyclohexyl)-3-(3-(trifluoromethoxy)phenyl)pyrazolo[1,5-*a*]pyrimidin-5-amine (**12**).

A solution of 5-chloro-3-(3-(trifluoromethoxy)phenyl)pyrazolo[1,5-*a*]pyrimidine (0.2 grams, 0.638 mmol) and *trans*-4-methoxycyclohexanamine (0.165 grams, 1.275 mmol) in iso-propanol (5 mL) was added DIPEA (0.165 grams, 1.275 mmol) and the mixture was heated at 150°C for 12 h under microwave irradiation. The resulting dark brown solution was cooled down and was concentrated under reduced pressure. The solid was further purified by using combiflash chromatography (12 g column), eluent: 0-6% CH<sub>3</sub>OH/DCM and obtained product (0.210 grams, 0.517 mmol, 81% yield.). <sup>1</sup>H-NMR (CD<sub>3</sub>OD/400 MHz): δ 8.30 (m, 1H), 8.22 (m, 2H), 7.82 (d, *J* = 8.0 Hz, 1H), 7.38 (t, *J* = 8.0 Hz, 1H), 6.38 (m, 1H), 6.22 (d, *J* = 7.6 Hz, 1H), 3.95 (m, 1H), 3.26 (m, 1H), 2.22 (m, 2H), 2.14 (m, 2H), 1.38 (m, 4H). MS (ES<sup>+</sup>, *m/z*): (M+H)<sup>+</sup>: 407.5. LC-MS purity of compound **12** was found to be >96%.

*N*-(Tetrahydro-2*H*-pyran-4-yl)-3-(3-(trifluoromethoxy)phenyl)pyrazolo[1,5-*a*]pyrimidin-5-amine (**13**).

<sup>1</sup>H-NMR (CDCl<sub>3</sub>/400 MHz): δ 8.32 (s, 1H), 8.29 (m, 2H), 7.83 (d, *J* = 8.0 Hz, 1H), 7.41 (t, *J* = 8.0 Hz, 1H), 7.02 (d, *J* = 8.0 Hz, 1H), 6.29 (d, *J* = 8.0 Hz, 1H), 4.24 (m, 1H), 4.02 (m, 2H), 3.60 (t, *J* = 12.0 Hz, 2H), 2.12 (m, 2H), 1.62 (m, 2H). MS (ES<sup>+</sup>, *m/z*): (M+H)<sup>+</sup>: 379.4. LC-MS purity of compound **13** was found to be >96%.

4-(((3-(3-(Trifluoromethoxy)phenyl)pyrazolo[1,5-*a*]pyrimidin-5-yl)amino)methyl)tetrahydro-2*H*-thiopyran 1,1-dioxide (**14**).

A solution of 5-chloro-3-(3-(trifluoromethoxy)phenyl)pyrazolo[1,5-*a*]pyrimidine (0.2 grams, 0.638 mmol) and 4-(aminomethyl)tetrahydro-2*H*-thiopyran 1,1-dioxide (0.104 grams, 0.638 mmol) in iso-propanol (5 mL) was added DIPEA (0.165 grams, 1.275 mmol) and the mixture was heated at 150°C for 12 h under microwave irradiation. The resulting dark brown solution was cooled down and was concentrated under reduced pressure. The solid was further purified by using combiflash chromatography (12 g column), eluent: 0-6% CH<sub>3</sub>OH/DCM and obtained

product (0.080 grams, 0.182 mmol, 29% yield.). <sup>1</sup>H-NMR (CD<sub>3</sub>OD/400 MHz): δ 8.24 (m, 2H), 8.21 (s, 1H), 7.70 (d, *J* = 8.0 Hz, 1H), 7.38 (d, *J* = 8.0 Hz, 1H), 7.23 (m, 1H), 6.07 (d, *J* = 7.2 Hz, 1H), 3.51 (t, *J* = 6.4 Hz, 2H), 3.06 (m, 2H), 3.00 (m, 2H), 2.22 (m, 3H), 1.96 (m, 2H). MS (ES<sup>+</sup>, *m/z*): (M+H)<sup>+</sup>: 441.4. LC-MS purity of compound **14** was found to be >96%.

*N*-((1-Methylpiperidin-4-yl)methyl)-3-(3-(trifluoromethoxy)phenyl)pyrazolo[1,5-*a*]pyrimidin-5-amine (**1**).

A solution of 5-chloro-3-(3-(trifluoromethoxy)phenyl)pyrazolo[1,5-*a*]pyrimidine (0.2 grams, 0.638 mmol) and (1-methylpiperidin-4-yl)methanamine (0.082 grams, 0.638 mmol) in iso-propanol (5 mL) was added DIPEA (0.165 grams, 1.275 mmol) and the mixture was heated at 150°C for 12 h under microwave irradiation. The resulting dark brown solution was cooled down and was concentrated under reduced pressure. The solid was further purified by using combiflash chromatography (12 g column), eluent: 0-6% CH<sub>3</sub>OH/DCM and obtained product (0.160 grams, 0.395 mmol, 62% yield.). <sup>1</sup>H-NMR (CD<sub>3</sub>OD/400 MHz): δ 8.26 (m, 3H), 7.86 (d, *J* = 8.0 Hz, 1H), 7.37 (m, 1H), 6.99 (d, *J* = 8.0 Hz, 1H), 6.28 (d, *J* = 7.2 Hz, 1H), 3.41 (d, *J* = 6.0 Hz, 2H), 2.80 (d, *J* = 12.0 Hz, 1H), 2.30 (s, 3H), 2.11 (t, *J* = 12.0 Hz, 1H), 1.89 (m, 3H), 1.44 (m, 2H), 1.29 (m, 2H). MS (ES<sup>+</sup>, *m/z*): (M+H)<sup>+</sup>: 391.4. LC-MS purity of compound **1** was found to be >96%.

*N*-(3-(3-(Trifluoromethoxy)phenyl)pyrazolo[1,5-*a*]pyrimidin-5-yl)cyclohexane-1,4-*trans*-diamine (**7**).

A solution of 5-chloro-3-(3-(trifluoromethoxy)phenyl)pyrazolo[1,5-*a*]pyrimidine (0.15 grams, 0.568 mmol) and *trans*-cyclohexane-1,4-diamine (0.130 grams, 1.136 mmol) in iso-propanol (5 mL) was added DIPEA (0.294 grams, 2.272 mmol) and the mixture was heated at 150°C for 12 h under microwave irradiation. The resulting dark brown solution was cooled down and was concentrated under reduced pressure. The solid was further purified by using combiflash chromatography (12 g column), eluent: 0-6% CH<sub>3</sub>OH/DCM and obtained product (0.075 grams, 0.219 mmol, 39% yield.). <sup>1</sup>H-NMR (CD<sub>3</sub>OD/400 MHz): δ 8.24 (m, 3H), 7.87 (d, *J* = 7.6 Hz, 1H), 7.39 (t, *J* = 8.0 Hz, 1H), 6.99 (d, *J* = 8.0 Hz, 1H), 6.24 (d, *J* = 7.6 Hz, 1H), 3.95 (m, 1H),

2.86 (m, 1H), 2.24 (m, 2H), 1.8 (m, 2H), 1.37 (t,  $J = 9.2$  Hz, 4H). MS (ES<sup>+</sup>, m/z): (M+H)<sup>+</sup>: 392.4. LC-MS purity of compound **7** was found to be >96%.

(S)-1-(3-(3-(Trifluoromethoxy)phenyl)pyrazolo[1,5-a]pyrimidin-5-yl)piperidin-3-amine (**8**).

<sup>1</sup>H-NMR (CD<sub>3</sub>OD/400 MHz):  $\delta$  8.32 (d,  $J = 8.0$  Hz, 1H), 8.24 (m, 1H), 8.07 (m, 1H), 7.85 (d,  $J = 5.6$  Hz, 1H), 7.38 (t,  $J = 8.0$  Hz, 1H), 6.95 (d,  $J = 7.6$  Hz, 1H), 6.61 (d,  $J = 7.6$  Hz, 1H), 4.22 (m, 2H), 3.17 (m, 2H), 2.91 (m, 1H), 2.10 (m, 1H), 1.80 (m, 1H), 1.60 (m, 1H), 1.50 (m, 1H). MS (ES<sup>+</sup>, m/z): (M+H)<sup>+</sup>: 378.5. LC-MS purity of compound **8** was found to be >96%.

Synthesis of Compound **9a**, 4-((3-(3-(Trifluoromethyl)phenyl)pyrazolo[1,5-a]pyrimidin-5-yl)amino) -*trans*-cyclohexanol.

A mixture of 2-(3-(trifluoromethyl)phenyl)acetonitrile (4.55 g, 24.58 mmol), 1,1-dimethoxy-*N,N*-dimethylmethanamine (13.10 ml, 98 mmol), and *N*<sup>1</sup>,*N*<sup>1</sup>,*N*<sup>2</sup>,*N*<sup>2</sup>-tetramethylethane-1,2-diamine (0.737 ml, 4.92 mmol) were heated to reflux for 5h. After cooling to RT, the mixture was partitioned between saturated aqueous NH<sub>4</sub>Cl and EtOAc and extracted three times with EtOAc. The combined organic phases were washed with brine, dried over Na<sub>2</sub>SO<sub>4</sub>, and concentrated *in vacuo*. After absorbing on celite, the compound was purified by combiflash chromatography (40g silica, 10% to 70% EtOAc/hexanes) to give pure 3-(dimethylamino)-2-(3-(trifluoromethyl)phenyl)acrylonitrile (2.93g, 50% yield). <sup>1</sup>H NMR (400 MHz, CDCl<sub>3</sub>): 7.48 (m, 2H), 7.41-7.34 (m, 2H), 6.94 (s, 1H), 3.25 (s, 6H).

To a mixture of 3-(dimethylamino)-2-(3-(trifluoromethyl)phenyl)acrylonitrile (2.93 g, 12.20 mmol) in ethanol (35 ml) was added hydrazine hydrate (3.80 ml, 122 mmol) and acetic acid (6.98 ml, 122 mmol). Upon to reflux; a solution formed. After 5 hours, 0.25 mL of hydrazine hydrate was added and the reaction refluxed an additional 15 hours. The volatiles were removed *in vacuo*, and the residue partitioned between EtOAc and water. After extracting three times with EtOAc, the combined organic phases were washed twice with saturated aqueous NaHCO<sub>3</sub>, dried over Na<sub>2</sub>SO<sub>4</sub>, and concentrated *in vacuo* to give pure 4-(3-(trifluoromethyl)phenyl)-1*H*-pyrazol-5-amine (2.7g, 97% yield) as a light yellow oil. <sup>1</sup>H NMR (400 MHz, CDCl<sub>3</sub>): 7.69 (m, 1H), 7.63 (m, 1H), 7.58 (s, 1H), 7.50 (m, 2H), 5.78 (br s, 3H).

To a mixture of 4-(3-(trifluoromethyl)phenyl)-1*H*-pyrazol-5-amine (2.7 g, 11.88 mmol) and 1,3-dimethylpyrimidine-2,4(1*H*,3*H*)-dione (1.999 g, 14.26 mmol) in ethanol (35 ml) was added

sodium ethoxide (1.132 g, 16.64 mmol). After heating to reflux 16 hours under Argon, the reaction was cooled to RT and the volatiles were removed *in vacuo*. The mixture was diluted with 30 mL H<sub>2</sub>O and acidified to pH=4 with AcOH. The resulting solid was collected by vacuum filtration. The solid was taken up in a 4:1 DCM/2-propanol solution, washed with water, dried over Na<sub>2</sub>SO<sub>4</sub>, and evaporated under vacuum to give pure 3-(3-(trifluoromethyl)phenyl)pyrazolo[1,5-a]pyrimidin-5(4*H*)-one (2.07 g, 7.41 mmol, 62.4% yield). <sup>1</sup>H NMR (400 MHz, DMSO-d<sub>6</sub>): 12.38 (br s, 1H), 8.62 (d, 1H), 8.38 (s, 1H), 8.05 (m, 2H), 7.60 (m, 2H), 6.20 (m, 1H).

A mixture of 3-(3-(trifluoromethyl)phenyl)pyrazolo[1,5-a]pyrimidin-5(4*H*)-one (2.07 g, 7.41 mmol) and POCl<sub>3</sub> (6.91 ml, 74.1 mmol) was heated to 107°C. The heating was continued for 16 hours. The reaction mixture was cooled to RT and the POCl<sub>3</sub> removed *in vacuo* to give a waxy solid. The solid was triturated multiple times with Et<sub>2</sub>O and the Et<sub>2</sub>O layers were combined and rotovaced. The resulting residue was taken up in DCM and washed with saturated aqueous NaHCO<sub>3</sub>, dried over Na<sub>2</sub>SO<sub>4</sub> and concentrated *in vacuo* to give 5-chloro-3-(3-(trifluoromethyl)phenyl)pyrazolo[1,5-a]pyrimidine (1.47g, 67% yield) as a brown solid. <sup>1</sup>H NMR (400 MHz, CDCl<sub>3</sub>): 8.60 (d, 1H), 8.47 (s, 1H), 8.24 (d, 1H), 8.19 (s, 1H), 7.55 (m, 2H), 6.87 (d, 1H).

A mixture of 5-chloro-3-(3-(trifluoromethyl)phenyl)pyrazolo[1,5-a]pyrimidine (100 mg, 0.336 mmol), 4-aminocyclohexanol (58.0 mg, 0.504 mmol), and DIEA (0.117 ml, 0.672 mmol) in 2-propanol (3 ml) was irradiated to 135°C for 14h in a Biotage microwave. After cooling, the mixture was diluted with saturated aqueous NaHCO<sub>3</sub>, and extracted three times with EtOAc. The combined extracts were washed with brine, dried over Na<sub>2</sub>SO<sub>4</sub> and concentrated *in vacuo*. After absorbing on celite, the compound was purified by combiflash chromatography (12g silica, 1/5/4 MeOH/EtOAc/hex) to give *trans*-4-((3-(3-(trifluoromethyl)phenyl)pyrazolo[1,5-a]pyrimidin-5-yl)amino)cyclohexanol (101 mg, 80% yield) as a white solid. <sup>1</sup>H NMR (400 MHz, CD<sub>3</sub>OD): 8.72 (s, 1H), 8.29 (s, 1H), 8.50 (d, 1H), 8.09 (d, 1H), 7.50 (t, 1H), 7.39 (d, 1H), 6.25 (d, 1H), 3.98 (m, 1H), 3.62 (m, 1H), 2.23 (m, 2H), 2.03 (m, 2H), 1.55-1.32 (m, 4H). MS (ES<sup>+</sup>, m/z): (M+H)<sup>+</sup>: 377.5. LC-MS purity of compound **9a** was found to be >96%.

Compounds **10a-14a** were prepared using similar procedures as in compound **9a**.

1-Methyl-4-((3-(3-(trifluoromethyl)phenyl)pyrazolo[1,5-a]pyrimidin-5-yl)amino) -*trans*-cyclohexanol (**10a**).

A mixture of 5-chloro-3-(3-(trifluoromethyl)phenyl)pyrazolo[1,5-a]pyrimidine (100 mg, 0.336 mmol), 4-aminocyclohexanol (58.0 mg, 0.504 mmol), and DIEA (0.117 ml, 0.672 mmol) in 2-propanol (3 ml) was irradiated to 135°C for 14h in a Biotage microwave. After cooling, the mixture was diluted with saturated aqueous NaHCO<sub>3</sub>, and extracted three times with EtOAc. The combined extracts were washed with brine, dried over Na<sub>2</sub>SO<sub>4</sub> and concentrated *in vacuo*. After absorbing on celite, the compound was purified by combiflash chromatography (12g silica, 1/5/4 MeOH/EtOAc/hex) to give *trans*-4-((3-(3-(trifluoromethyl)phenyl)pyrazolo[1,5-a]pyrimidin-5-yl)amino)cyclohexanol (101 mg, 80% yield) as a white solid. <sup>1</sup>H NMR (400 MHz, CD<sub>3</sub>OD): 8.69 (s, 1H), 8.29 (s, 1H), 8.25 (d, 1H), 8.11 (d, 1H), 7.30 (t, 1H), 7.39 (d, 1H), 6.31 (d, 1H), 4.09 (m, 1H), 2.15 (m, 2H), 1.79-1.52 (m, 6H), 1.30 (s, 3H). MS (ES<sup>+</sup>, m/z): (M+H)<sup>+</sup>: 391.5. LC-MS purity of compound **10a** was found to be >96%.

4-((3-(3-(Trifluoromethyl)phenyl)pyrazolo[1,5-a]pyrimidin-5-yl)amino) -*trans*-cyclohexyl)propan-2-ol (**11a**).

<sup>1</sup>H NMR (400 MHz, CD<sub>3</sub>OD): 8.78 (s, 1H), 8.18 (s, 1H), 8.24 (d, 1H), 8.05 (d, 1H), 7.49 (t, 1H), 7.38 (d, 1H), 6.25 (d, 1H), 3.95 (m, 1H), 2.28 (m, 2H), 1.95 (m, 2H), 1.32 (m, 5H), 1.20 (s, 6H). MS (ES<sup>+</sup>, m/z): (M+H)<sup>+</sup>: 419.5. LC-MS purity of compound **11a** was found to be >96%.

4-(*trans*-Methoxycyclohexyl)-3-(3-(trifluoromethyl)phenyl)pyrazolo[1,5-a]pyrimidin-5-amine (**12a**).

<sup>1</sup>H NMR (400 MHz, DMSO-d<sub>6</sub>): 8.76 (s, 1H), 8.49 (d, 1H), 8.45 (s, 1H), 8.13 (d, 1H), 7.66 (d, 1H), 7.56 (t, 1H), 7.42 (d, 1H), 6.30 (d, 1H), 3.75 (m, 1H), 3.27 (s, 3H), 3.19 (m, 1H), 2.10 (m, 4H), 1.30 (m, 4H). MS (ES<sup>+</sup>, m/z): (M+H)<sup>+</sup>: 391.5. LC-MS purity of compound **12a** was found to be >96%.

*N*-(Tetrahydro-2*H*-pyran-4-yl)-3-(3-(trifluoromethyl)phenyl)pyrazolo[1,5-a]pyrimidin-5-amine (**13a**).

<sup>1</sup>H NMR (400 MHz, DMSO-d<sub>6</sub>): 8.73 (s, 1H), 8.52 (d, 1H), 8.47 (s, 1H), 8.15 (d, 1H), 7.77 (d, 1H), 7.55 (t, 1H), 7.43 (d, 1H), 6.33 (d, 1H), 4.08 (m, 1H), 3.93 (m, 2H), 3.43 (m, 2H), 2.05 (m,



2H), 1.53 (m, 2H). MS (ES<sup>+</sup>, m/z): (M+H)<sup>+</sup>: 363.5. LC-MS purity of compound **13a** was found to be >96%.

4-(((3-(3-(Trifluoromethyl)phenyl)pyrazolo[1,5-a]pyrimidin-5-yl)amino)methyl)tetrahydro-2H-thiopyran 1,1-dioxide (**14a**).

<sup>1</sup>H NMR (400 MHz, CD<sub>3</sub>OD): 8.66 (s, 1H), 8.31 (s, 1H), 8.29 (s, 1H), 8.12 (d, 1H), 7.52 (t, 1H), 7.40 (d, 1H), 6.31 (d, 1H), 3.50 (d, 2H), 3.18 (m, 4H), 2.21 (m, 3H), 1.88 (m, 2H). MS (ES<sup>+</sup>, m/z): (M+H)<sup>+</sup>: 425.5. LC-MS purity of compound **14a** was found to be >96%.

4-(3-(3-(Trifluoromethyl)phenyl)pyrazolo[1,5-a]pyrimidin-5-yl)thiomorpholine 1,1-dioxide (**15a**).

<sup>1</sup>H NMR (400 MHz, DMSO-d<sub>6</sub>): 8.82 (d, 1H), 8.61 (s, 1H), 8.48 (m, 1H), 8.28 (d, 1H), 7.61 (t, 1H), 7.48 (d, 1H), 6.98 (d, 1H), 4.22 (m, 4H), 3.28 (m, 4H). MS (ES<sup>+</sup>, m/z): (M+H)<sup>+</sup>: 397.4. LC-MS purity of compound **15a** was found to be >96%.

4-(((3-(3-Chlorophenyl)pyrazolo[1,5-a]pyrimidin-5-yl)amino) -trans-cyclohexanol (**9b**).

Synthesis of 3-(dimethylamino)-2-(3-chlorophenyl)acrylonitrile.

A mixture of 3-chlorophenylacetonitrile (5 grams, 33.0 mmol), *N*<sup>1</sup>,*N*<sup>1</sup>,*N*<sup>2</sup>,*N*<sup>2</sup>-tetramethyl-ethane-1,2-diamine (0.767 grams, 6.60 mmol), and dimethyl formamide dimethyl acetal (20 mL) were heated at reflux for 4 h. On cooling, the reaction was partitioned between EtOAc and saturated aqueous NH<sub>4</sub>Cl solution. The aqueous phase was extracted with ethyl acetate and the combined organic phases were washed with brine and concentrated *in vacuo*. The crude product was purified by combiflash chromatography (ethyl acetate/hexane, 0-10%) on silica gel (24 grams) to give pure product (6.8 grams, 33.0 mmol, 100% yield.). <sup>1</sup>H-NMR (CDCl<sub>3</sub>/400 MHz): δ 7.31 (m, 2H), 7.22 (m, 2H), 7.08 (m, 1H), 3.31 (s, 3H), 3.30 (s, 3H).

Synthesis of 4-(3-chlorophenyl)-1*H*-pyrazol-5-amine

A mixture of acrylnitrile (5.0 g, 24.19 mmol), hydrazine hydrate (7.75 grams, 242 mmol), and glacial acetic acid (14.53 grams, 242 mmol) and ethanol (20 mL) were heated at reflux for 16 h. On cooling, the reaction was diluted with water, extracted with AcOEt and the combined organic phases were washed with brine and concentrated *in vacuo* (4.0 grams, 20.66 mmol, 85% yield.).

<sup>1</sup>H-NMR (CDCl<sub>3</sub>/400 MHz): δ 7.63 (m, 1H), 7.52 (m, 1H), 7.42 (d, *J* = 8.0 Hz, 1H), 7.33 (t, *J* = 8.0 Hz, 1H), 7.17 (d, *J* = 8.0 Hz, 1H). MS (ES<sup>+</sup>, *m/z*): (M+H)<sup>+</sup>: 194.3.

#### Synthesis of 3-(3-chlorophenyl)pyrazolo[1,5-a]pyrimidin-5(4H)-one

A mixture of pyrazole (4.0 grams, 20.66 mmol), 1,3-dimethyluracil (3.47 grams, 24.79 mmol), and dry EtOH 10 mL were treated dropwise with sodium ethoxide (1.97 grams, 28.9 mmol) and on completion of addition the reaction was heated at reflux for 16 h. On cooling the reaction was concentrated *in vacuo* and the residue added to ice, neutralized with acetic acid and the resulting precipitate filtered, washed with water and dried to give the product (4.0 grams, 16.28 mmol, 79% yield.). No chromatography was needed for this step. <sup>1</sup>H-NMR (CDCl<sub>3</sub>/400 MHz): δ 8.38 (d, *J* = 8.4 Hz, 1H), 8.04 (s, 1H), 7.65 (s, 1H), 7.65 (s, 1H), 7.51 (m, 1H), 7.40 (t, *J* = 8.0 Hz, 1H), 7.27 (d, *J* = 8.0 Hz, 1H), 6.12 (d, *J* = 7.6 Hz, 1H). MS (ES<sup>+</sup>, *m/z*): (M+H)<sup>+</sup>: 246.3.

#### Synthesis of 5-chloro-3-(3-chlorophenyl)pyrazolo[1,5-a]pyrimidine.

A mixture of pyrazolepyrimidinone (4.0 grams, 16.28 mmol) was treated with POCl<sub>3</sub> 10 mL and the mixture was heated at reflux for overnight. On cooling, after remove the solvent under rotovapor, the reaction was poured onto ice, cautiously made basic with saturated aqueous NaHCO<sub>3</sub> solution and extracted with EtOAc. The combined organic phases were washed with brine and concentrated *in vacuo* to give the product (0.65 grams, 2.46 mmol, 15% yield.). <sup>1</sup>H-NMR (CDCl<sub>3</sub>/400 MHz): δ 8.89 (d, *J* = 7.4 Hz, 1H), 8.61 (s, 1H), 8.10 (m, 1H), 7.96 (d, *J* = 7.6 Hz, 1H), 7.40 (t, *J* = 8.0 Hz, 1H), 7.26 (d, *J* = 8.0 Hz, 1H), 7.06 (d, *J* = 7.2 Hz, 1H). MS (ES<sup>+</sup>, *m/z*): (M)<sup>+</sup>: 264.3.

#### Synthesis of 4-((3-(3-chlorophenyl)pyrazolo[1,5-a]pyrimidin-5-yl)amino)cyclohexanol

A solution of 3-chloro-5-chloropyrazolo[1,5-a]pyrimidine (0.150 grams, 0.568 mmol) and *trans*-4-aminocyclohexanol (0.131 grams, 1.14 mmol) in iso-propanol (5 mL) was added DIPEA (0.177 grams, 2.272 mmol) and the mixture was heated at 150°C for 12 h under microwave irradiation. The resulting dark brown solution was cooled down and was concentrated under reduced pressure. The solid was further purified by using combiflash chromatography (12 g column), eluent: 0-6% CH<sub>3</sub>OH/DCM and obtained product (0.100 grams, 0.292 mmol, 52% yield.). <sup>1</sup>H-NMR (CD<sub>3</sub>OD/400 MHz): δ 8.41 (s, 1H), 8.24 (d, *J* = 8.0 Hz, 2H), 7.80 (d, *J* = 8.0 Hz, 1H), 7.30 (t, *J* = 8.4 Hz, 1H), 7.10 (m, 1H), 6.25 (d, *J* = 7.6 Hz, 1H), 3.95 (m, 1H), 3.63 (m, 1H), 2.26 (m, 2H), 2.04 (m, 2H), 1.55 (m, 2H), 1.39 (m, 2H). MS (ES<sup>+</sup>, *m/z*): (M+H)<sup>+</sup>: 343.5.

LC-MS purity of compound **9b** was found to be >96%.

Compounds **7b-15b** were prepared using similar procedures as in Compound **9b**.

*N*-(3-(3-Chlorophenyl)pyrazolo[1,5-*a*]pyrimidin-5-yl)cyclohexane-1,4-*trans*-diamine (**7b**).

A mixture of 5-chloro-3-(3-chlorophenyl)pyrazolo[1,5-*a*]pyrimidine (0.150 g, 0.568 mmol), *trans*-cyclohexane-1,4-diamine (0.130 g, 1.136 mmol), and DIPEA (0.294 g, 2.276 mmol) in 2-propanol (3 ml) was irradiated to 150°C for 14h in a Biotage microwave. After cooling, the mixture was diluted with saturated aqueous NaHCO<sub>3</sub>, and extracted three times with EtOAc. The combined extracts were washed with brine, dried over Na<sub>2</sub>SO<sub>4</sub> and concentrated in vacuo. After absorbing on celite, the compound was purified by combiflash chromatography (12g silica, 0-15% methanol/DCM) to give *N*-(3-(3-Chlorophenyl)pyrazolo[1,5-*a*]pyrimidin-5-yl)cyclohexane-1,4-*trans*-diamine (0.075 g, 0.219 mmol, 39% yield) as a white solid. <sup>1</sup>H-NMR (CD<sub>3</sub>OD/400 MHz): δ 8.37 (s, 1H), 8.23 (m, 2H), 7.80 (d, *J* = 8.0 Hz, 1H), 7.28 (t, *J* = 7.6 Hz, 1H), 7.09 (d, *J* = 7.6 Hz, 1H), 6.23 (d, *J* = 7.2 Hz, 1H), 3.90 (m, 1H), 2.75 (m, 1H), 2.27 (m, 2H), 2.05 (m, 2H), 1.36 (m, 4H). MS (ES<sup>+</sup>, *m/z*): (M+H)<sup>+</sup>: 325.5. LC-MS purity of compound **7b** was found to be >96%.

(*S*)-1-(3-(3-Chlorophenyl)pyrazolo[1,5-*a*]pyrimidin-5-yl)piperidin-3-amine (**8b**).

A mixture of 5-chloro-3-(3-chlorophenyl)pyrazolo[1,5-*a*]pyrimidine (100 mg, 0.379 mmol), (*S*)-piperidin-3-amine (76 mg, 0.757 mmol), and DIPEA (0.158 ml, 1.515 mmol) in 2-propanol (3 ml) was irradiated to 150°C for 14h in a Biotage microwave. After cooling, the mixture was diluted with saturated aqueous NaHCO<sub>3</sub>, and extracted three times with EtOAc. The combined extracts were washed with brine, dried over Na<sub>2</sub>SO<sub>4</sub> and concentrated in vacuo. After absorbing on celite, the compound was purified by combiflash chromatography (12g silica, 0-15% methanol/DCM) to give (*S*)-1-(3-(3-chlorophenyl)pyrazolo[1,5-*a*]pyrimidin-5-yl)piperidin-3-amine (35 mg, 28% yield) as a white solid. <sup>1</sup>H-NMR (CD<sub>3</sub>OD/400 MHz): 8.47 (d, *J* = 8.0 Hz, 1H), 8.29 (s, 1H), 8.03 (s, 1H), 7.92 (m, 1H), 7.33 (t, *J* = 8.0 Hz, 1H), 7.13 (d, *J* = 8.0 Hz, 1H), 6.73 (d, *J* = 8.0 Hz, 1H), 4.27 (m, 1H), 4.02 (m, 1H), 3.50 (m, 1H), 3.40 (m, 1H), 2.20 (m, 1H), 1.90 (m, 1H), 1.80 (m, 2H), 1.36 (m, 1H). MS (ES<sup>+</sup>, *m/z*): (M+H)<sup>+</sup>: 328.5. LC-MS purity of compound **8b** was found to be >96%.

4-((3-(3-Chlorophenyl)pyrazolo[1,5-a]pyrimidin-5-yl)amino)-1-methyl-*trans*-cyclohexanol (**10b**).

<sup>1</sup>H-NMR (CD<sub>3</sub>OD/400 MHz): δ 8.36 (s, 1H), 8.23 (m, 2H), 7.84 (d, *J* = 8.0 Hz, 1H), 7.30 (t, *J* = 8.0 Hz, 1H), 7.11 (d, *J* = 7.6 Hz, 1H), 6.29 (d, *J* = 7.6 Hz, 1H), 4.02 (m, 1H), 2.20 (m, 2H), 1.75 (m, 4H), 1.50 (m, 2H), 1.29 (s, 6H). MS (ES<sup>+</sup>, *m/z*): (M+H)<sup>+</sup>: 357.5. LC-MS purity of compound **10b** was found to be >96%.

4-((3-(3-Chlorophenyl)pyrazolo[1,5-a]pyrimidin-5-yl)amino) -*trans*-cyclohexyl)propan-2-ol (**11b**).

<sup>1</sup>H-NMR (CD<sub>3</sub>OD/400 MHz): δ 8.35 (s, 1H), 8.12 (m, 2H), 7.72 (d, *J* = 8.0 Hz, 1H), 7.27 (t, *J* = 8.0 Hz, 1H), 7.09 (d, *J* = 7.6 Hz, 1H), 6.20 (d, *J* = 7.6 Hz, 1H), 3.95 (m, 1H), 2.30 (m, 2H), 1.94 (m, 2H), 1.32 (m, 4H), 1.50 (s, 6H). MS (ES<sup>+</sup>, *m/z*): (M+H)<sup>+</sup>: 385.5. LC-MS purity of compound **11b** was found to be >96%.

3-((3-Chlorophenyl)-*N*-4-methoxy-*trans*-cyclohexyl)pyrazolo[1,5-a]pyrimidin-5-amine (**12b**).

A solution of 3-chloro-5-chloropyrazolo[1,5-a]pyrimidine (0.920 grams, 3.48 mmol) and *trans*-(4-aminocyclohexyl)propan-2-ol (0.822 grams, 5.23 mmol) in iso-propanol (5 mL) was added DIPEA (1.089 grams, 13.93 mmol) and the mixture was heated at 150°C for 12 h under microwave irradiation. The resulting dark brown solution was cooled down and was concentrated under reduced pressure. The solid was further purified by using combiflash chromatography (40 g column), eluent: 0-6% CH<sub>3</sub>OH/DCM and obtained product (0.520 grams, 1.351 mmol, 39% yield.). <sup>1</sup>H-NMR (CD<sub>3</sub>OD/400 MHz): δ 8.40 (s, 1H), 8.23 (m, 2H), 7.80 (d, *J* = 8.0 Hz, 1H), 7.29 (t, *J* = 8.0 Hz, 1H), 7.05 (d, *J* = 8.0 Hz, 1H), 6.22 (d, *J* = 7.6 Hz, 1H), 3.95 (m, 1H), 3.30 (m, 1H), 2.25 (m, 2H), 2.15 (m, 2H), 1.45 (m, 4H). MS (ES<sup>+</sup>, *m/z*): (M+H)<sup>+</sup>: 357.5. LC-MS purity of compound **12b** was found to be >96%.

3-(3-Chlorophenyl)-*N*-(tetrahydro-2*H*-pyran-4-yl)pyrazolo[1,5-a]pyrimidin-5-amine (**13b**).

<sup>1</sup>H-NMR (CDCl<sub>3</sub>/400 MHz): δ 8.32 (s, 1H), 8.15 (m, 2H), 7.72 (d, *J* = 8.0 Hz, 1H), 7.26 (t, *J* = 8.0 Hz, 1H), 7.08 (d, *J* = 8.0 Hz, 1H), 6.23 (d, *J* = 8.0 Hz, 1H), 4.20 (m, 1H), 4.00 (m, 2H), 3.62

(t,  $J = 12.0$  Hz, 2H), 2.17 (m, 2H), 1.62 (m, 2H). MS ( $\text{ES}^+$ ,  $m/z$ ): ( $\text{M}+\text{H}$ ) $^+$ : 329.5. LC-MS purity of compound **13b** was found to be >96%.

4-(((3-(3-Chlorophenyl)pyrazolo[1,5-a]pyrimidin-5-yl)amino)methyl)tetrahydro-2*H*-thiopyran 1,1-dioxide (**14b**).

$^1\text{H-NMR}$  ( $\text{CD}_3\text{OD}/400$  MHz):  $\delta$  8.35 (s, 1H), 8.28 (d,  $J = 8.0$  Hz, 1H), 8.24 (s, 1H), 7.81 (d,  $J = 8.0$  Hz, 1H), 7.31 (t,  $J = 7.2$  Hz, 1H), 7.11 (d,  $J = 7.2$  Hz, 1H), 6.29 (d,  $J = 7.2$  Hz, 1H), 3.46 (m, 2H), 3.10 (m, 4H), 2.27 (m, 3H), 1.89 (m, 2H). MS ( $\text{ES}^+$ ,  $m/z$ ): ( $\text{M}+\text{H}$ ) $^+$ : 391.4. LC-MS purity of compound **14b** was found to be >96%.

4-(((3-(3-Chlorophenyl)pyrazolo[1,5-a]pyrimidin-5-yl)amino)cyclohexanone (**16b**).

A mixture of 5-chloro-3-(3-chlorophenyl)pyrazolo[1,5-a]pyrimidine (100 mg, 0.379 mmol), 4-aminocyclohexanone (43 mg, 0.379 mmol), and DIPEA (0.158 ml, 1.515 mmol) in 2-propanol (3 ml) was irradiated to 150°C for 14h in a Biotage microwave. After cooling, the mixture was diluted with saturated aqueous  $\text{NaHCO}_3$ , and extracted three times with EtOAc. The combined extracts were washed with brine, dried over  $\text{Na}_2\text{SO}_4$  and concentrated in vacuo. After absorbing on celite, the compound was purified by combiflash chromatography (12g silica, 0-15% methanol/DCM) to give 4-(((3-(3-chlorophenyl)pyrazolo[1,5-a]pyrimidin-5-yl)amino)cyclohexanone (30 mg, 24% yield) as a white solid.  $^1\text{H-NMR}$  ( $\text{CD}_3\text{OD}/400$  MHz): 8.35 (s, 1H), 8.26 (d,  $J = 7.6$  Hz, 1H), 8.21 (d,  $J = 10.4$  Hz, 1H), 7.79 (m, 1H), 7.08 (m, 1H), 6.26 (m, 1H), 4.40 (m, 1H), 2.62 (m, 2H), 2.47 (m, 2H), 2.00 (m, 1H), 1.84 (m, 2H), 1.65 (m, 1H). MS ( $\text{ES}^+$ ,  $m/z$ ): ( $\text{M}+\text{H}$ ) $^+$ : 341.4. LC-MS purity of compound **16b** was found to be >96%.

## 2.1. Pim-1 and Pim-2 Kinase Inhibition Assay.

Pim-1 and Pim-2 Kinase-Glo assays using ATP were used to determine the biochemical activity of the inhibitors. The activity of Pim-1 and Pim-2 was measured using a luciferase-luciferin based ATP detection reagent (The Kinase-Glo Assay Kit, Promega, Inc., Madison, WI) to quantify ATP depletion resulting from kinase-catalyzed phosphoryl transfer to a peptide substrate. The amount of ATP remaining in the solution after the kinase reaction served as a substrate for the luciferase to catalyze luciferin to oxyluciferin plus one photon of light. Thus, the luminescent

signal read by the Luminoskan Ascent Instrument (Thermo Electron Corp., Milford, MA) correlated with the amount of ATP present after the kinase reaction and inversely correlated with the amount of kinase activity. These assays were set up in duplicate 50 $\mu$ L volumes in white, flat bottom 96 well plates. Inhibitors were added to the solution of 1X kinase buffer, 10 $\mu$ M ATP, 100 $\mu$ M Pim-1(Pim-2)-specific substrate, 50ng of active Pim-1 (Pim-2) enzyme, and water in serial dilutions ranging from micromolar to nanomolar concentrations. This solution was incubated at 30 degrees Celsius at 360rpm for two hours. Following the incubation, 50 $\mu$ L of Kinase-Glo reagent was added to each well, including all positive and negative control wells, and incubated at room temperature for 15 minutes. The plate was then read by the Luminoskan Ascent instrument and the results displayed with the Ascent Software version 2.6. The IC<sub>50</sub> values were calculated for each inhibitor tested.

## **2.2. In Vitro Antiproliferative Assay.**

Briefly, cells were seeded into 96-well, tissue-culture treated, opaque white plates (Thermo Electron, Vantaa, Finland), at between 5000 and 10000 cells per well, depending on the speed of cell proliferation, in 100  $\mu$ L of appropriate growth medium (determined by the ATCC). Cells were then exposed to the appropriate concentration of drug or an equal amount of DMSO (drug diluent) and allowed to grow in its presence for 96 hours. Following this, 100  $\mu$ L of Cell-Titer-Glo reagent (Promega, Inc., Madison, WI) was added to each well. Plates were then shaken for 2 minutes at room temperature to allow for cell lysis and incubated for 10 minutes at room temperature to stabilize the luminescent signal. Similar to the Kinase-Glo assay reagent from Promega, this reagent contained both luciferase enzyme and its substrate luciferin. Luciferase, activated by ATP in the cell lysate, catalyzes the conversion of luciferin to oxyluciferin, a reaction which produces light. The amount of light produced was proportionated to the amount of ATP in the cell lysate, which is itself proportional to the cell number and provides an index of cellular proliferation.

## **2.3. Western blotting assay.**

Western blot assay was performed to detect specific inhibition of Pim-1 enzyme in cell culture. Cells which have been treated with a potential Pim-1 inhibitor were lysed with a buffer specific

for the isolation and preservation of proteins (1% Nonidet P-40, 150mM NaCl, 50mM Tris pH 8.0, 5mM EDTA, 1:500 Protease Inhibitor Cocktail III [Calbiochem], 100mM NaF, 100mM Sodium Orthovanadate). The protein concentration in these lysates was then quantified using the BCA Protein Assay Kit (Pierce). Known amounts of protein, e.g. 10 µg, are loaded onto 12% SDS-polyacrylamide gels and are subjected to reducing, denaturing SDS-PAGE.

Electrophoresed proteins were transferred to a nitrocellulose membrane, which is then probed with antibodies to p-21 and phospho (Thr 145) p-21. As Threonine-145 of the p-21 protein is a substrate for Pim-1, measuring the amount of phosphorylation at this site in treated cells should provide a means by which to evaluate the efficacy of Pim-1 inhibitors.

#### **2.4. *h*ERG assay.**

Compounds were tested for effects on *h*ERG potassium channels by an automated patch clamp method (QPatchHTX) at WuXi AppTec (Shanghai, China). Chinese hamster ovary cells stably expressing *h*ERG potassium channels from Aviva Biosciences were tested with compound at six concentrations, 3-fold dilution starting at 30 µM with a final DMSO concentration of 0.15%, and compared to vehicle (negative) control and Amitriptyline (positive) controls. Percent of control (vehicle) values were calculated in duplicate for each concentration of drug, and curve-fitting and IC<sub>50</sub> calculations were performed by QPatch Assay Software.

#### **2.5. Clonogenic cell survival assay.**

UM-UC-3 and HSC-3 cells were seeded at 300 cells/well in a 12-well plate and treated with the indicated concentration of compound **11b** (5 nM, 14 nM, 40 nM, 120 nM, 370 nM, 1.1 µM, 3.3 µM, 10 µM, 30 µM) or DMSO for 24 hours after seeding. After compound treatment, cells were incubated in drug-free cell culture medium for 10 days at 37°C in 5% CO<sub>2</sub>. Subsequently, the cells were fixed with 4% paraformaldehyde in PBS, washed twice with PBS, and stained with a crystal violet solution (1% crystal violet, 10% ethanol in water). Stained cells were washed twice with water, and imaged after drying on a GelCount colony counter (Oxford Optronix Ltd., Oxford, UK). Total staining intensity per well was determined by lysis of cells with 200 µL of Triton X-100 lysis buffer (1% Triton X-100, 50 mM Tris-HCl pH 7.4, 150 mM NaCl, 1 mM EDTA). Lysates (100 µL) from each well were transferred to a clear 96-well plate and

absorbance at 560 nm was determined on an Envision microplate reader. IC<sub>50</sub> values were determined using GraphPad Prism software.

## 2.6. Kinase selectivity of compound **11b** against a panel of 119 oncogenic kinases.

The kinase selectivity of compound **11b** was investigated by screening it against a panel of 119 oncogenic kinases (oncoKP, Reaction Biology Corporation, PA, USA) at a single concentration (1  $\mu$ M).

Reference compounds and their IC<sub>50</sub>s against a panel of 119 oncogenic kinases.

| Kinase        | IC50 (nM)<br>Staurosporine* | IC50 (nM)<br>Alternate Control<br>cpd*. | Alternate<br>compound ID |
|---------------|-----------------------------|-----------------------------------------|--------------------------|
| ABL1          | 32.86                       |                                         |                          |
| ABL2/ARG      | 9.28                        |                                         |                          |
| AKT1          | 1.03                        |                                         |                          |
| AKT2          | 5.55                        |                                         |                          |
| AKT3          | 1.07                        |                                         |                          |
| Aurora A      | < 1.0                       |                                         |                          |
| Aurora B      | 1.39                        |                                         |                          |
| Aurora C      | < 1.0                       |                                         |                          |
| AXL           | 5.09                        |                                         |                          |
| BRAF          | ND                          | 90.32                                   | GW5074                   |
| BRK           | 133.20                      |                                         |                          |
| BTK           | 11.31                       |                                         |                          |
| CDK1/cyclin B | 1.51                        |                                         |                          |
| CDK2/cyclin A | < 1.0                       |                                         |                          |



|                |        |          |            |
|----------------|--------|----------|------------|
| CDK4/cyclin D1 | 4.98   |          |            |
| CDK5/p25       | 1.07   |          |            |
| CDK6/cyclin D1 | 1.16   |          |            |
| CDK7/cyclin H  | 296.70 |          |            |
| CDK9/cyclin T1 | 9.53   |          |            |
| CHK1           | < 1.0  |          |            |
| CHK2           | 1.81   |          |            |
| CK1epsilon     | ND     | 449.60   | D4476      |
| CK2a           | ND     | 234.00   | GW5074     |
| c-Kit          | 16.58  |          |            |
| c-MET          | 138.90 |          |            |
| COT1/MAP3K8    | ND     | 10150.00 | Ro-31-8220 |
| c-Src          | 1.06   |          |            |
| CTK/MATK       | 445.90 |          |            |
| DAPK1          | 2.11   |          |            |
| DNA-PK         | ND     | 257.50   | LY294002   |
| EEF2K          | ND     | 8333.00  | NH125      |
| EGFR           | 63.67  |          |            |
| EPHA1          | 58.21  |          |            |
| EPHA2          | 42.19  |          |            |
| EPHA3          | 14.26  |          |            |
| EPHA4          | 15.54  |          |            |
| EPHA5          | 33.64  |          |            |
| EPHA7          | 22.65  |          |            |

|             |         |         |            |
|-------------|---------|---------|------------|
| EPHA8       | 98.37   |         |            |
| EPHB1       | 34.05   |         |            |
| EPHB2       | 155.30  |         |            |
| EPHB3       | 1279.00 |         |            |
| EPHB4       | 89.02   |         |            |
| ERBB2/HER2  | 210.40  |         |            |
| ERBB4/HER4  | 213.00  |         |            |
| FAK/PTK2    | 4.47    |         |            |
| FER         | < 1.0   |         |            |
| FES/FPS     | < 1.0   |         |            |
| FGFR1       | 7.14    |         |            |
| FGFR2       | 1.64    |         |            |
| FGFR3       | 5.13    |         |            |
| FGFR4       | 66.23   |         |            |
| FGR         | < 1.0   |         |            |
| FLT1/VEGFR1 | 3.33    |         |            |
| FLT3        | < 1.0   |         |            |
| FLT4/VEGFR3 | 1.13    |         |            |
| FMS         | < 1.0   |         |            |
| FYN         | < 1.0   |         |            |
| Haspin      | 3.45    |         |            |
| HCK         | < 1.0   |         |            |
| HGK/MAP4K4  | < 1.0   |         |            |
| HIPK1       | ND      | 6932.00 | Ro-31-8220 |

|                |          |         |           |
|----------------|----------|---------|-----------|
| HIPK2          | 699.60   |         |           |
| HIPK3          | 2484.00  |         |           |
| HIPK4          | 496.30   |         |           |
| IGF1R          | 51.47    |         |           |
| IKKa/CHUK      | 90.07    |         |           |
| IKKb/IKBKB     | 251.30   |         |           |
| IKKe/IKBKE     | < 1.0    |         |           |
| JAK1           | < 1.0    |         |           |
| JAK2           | < 1.0    |         |           |
| JAK3           | < 1.0    |         |           |
| JNK1           | 15620.00 |         |           |
| JNK2           | 11940.00 |         |           |
| JNK3           | ND       | 4164.00 | JNKi VIII |
| KDR/VEGFR2     | 5.75     |         |           |
| LCK            | < 1.0    |         |           |
| LKB1           | 30.91    |         |           |
| LYN            | 3.16     |         |           |
| MEK1           | 3.27     |         |           |
| MEK2           | 40.62    |         |           |
| MRCKa/CDC42BPA | 2.53     |         |           |
| MRCKb/CDC42BPB | 1.77     |         |           |
| MST4           | 1.06     |         |           |
| MUSK           | 61.95    |         |           |
| NEK1           | 4.49     |         |           |

|                |        |       |          |
|----------------|--------|-------|----------|
| P38a/MAPK14    | ND     | 22.89 | SB202190 |
| P38b/MAPK11    | ND     | 78.76 | SB202190 |
| P38d/MAPK13    | 92.99  |       |          |
| P38g           | 150.90 |       |          |
| p70S6K/RPS6KB1 | < 1.0  |       |          |
| PAK4           | 1.18   |       |          |
| PDGFRa         | < 1.0  |       |          |
| PDGFRb         | 1.14   |       |          |
| PIM1           | 1.03   |       |          |
| PIM2           | 15.95  |       |          |
| PKCa           | < 1.0  |       |          |
| PKCb1          | 1.71   |       |          |
| PKCd           | < 1.0  |       |          |
| PKCepsilon     | < 1.0  |       |          |
| PKCeta         | < 1.0  |       |          |
| PKCtheta       | < 1.0  |       |          |
| PLK1           | 162.30 |       |          |
| PYK2           | 3.34   |       |          |
| RAF1           | ND     | 9.03  | GW5074   |
| RET            | 1.71   |       |          |
| ROCK1          | < 1.0  |       |          |
| RON/MST1R      | 118.70 |       |          |
| ROS/ROS1       | < 1.0  |       |          |
| SGK1           | 2.76   |       |          |

|           |         |  |  |
|-----------|---------|--|--|
| SYK       | < 1.0   |  |  |
| TGFBR2    | > 20000 |  |  |
| TIE2/TEK  | 23.05   |  |  |
| TNIK      | < 1.0   |  |  |
| TRKA      | < 1.0   |  |  |
| TRKB      | < 1.0   |  |  |
| TRKC      | < 1.0   |  |  |
| TYRO3/SKY | 3.97    |  |  |
| YES/YES1  | < 1.0   |  |  |

\* Values represent the average of 2 separate experiments.

| <b>11b</b> |           |
|------------|-----------|
| kinase     | Activity* |
| ABL1       | 76.54     |
| ABL2/ARG   | 83.97     |
| AKT1       | 95.34     |
| AKT2       | 90.30     |
| AKT3       | 91.86     |
| Aurora A   | 83.98     |
| Aurora B   | 84.99     |
| Aurora C   | 91.90     |
| AXL        | 67.49     |

|                |        |
|----------------|--------|
| BRAF           | 110.28 |
| BRK            | 52.25  |
| BTK            | 81.54  |
| CDK1/cyclin B  | 73.77  |
| CDK2/cyclin A  | 74.96  |
| CDK4/cyclin D1 | 87.00  |
| CDK5/p25       | 87.59  |
| CDK6/cyclin D1 | 97.80  |
| CDK7/cyclin H  | 80.37  |
| CDK9/cyclin T1 | 70.78  |
| CHK1           | 91.63  |
| CHK2           | 102.08 |
| CK1epsilon     | 90.20  |
| CK2a           | 25.47  |
| c-Kit          | 54.35  |
| c-MET          | 91.71  |
| COT1/MAP3K8    | 89.49  |
| c-Src          | 41.45  |
| CTK/MATK       | 96.53  |
| DAPK1          | 57.45  |
| DNA-PK         | 85.70  |
| EEF2K          | 84.93  |
| EGFR           | 101.09 |
| EPHA1          | 90.62  |

|             |        |
|-------------|--------|
| EPHA2       | 102.09 |
| EPHA3       | 108.22 |
| EPHA4       | 98.00  |
| EPHA5       | 107.83 |
| EPHA7       | 89.99  |
| EPHA8       | 91.50  |
| EPHB1       | 96.41  |
| EPHB2       | 103.05 |
| EPHB3       | 104.62 |
| EPHB4       | 92.66  |
| ERBB2/HER2  | 103.96 |
| ERBB4/HER4  | 92.55  |
| FAK/PTK2    | 91.48  |
| FER         | 80.25  |
| FES/FPS     | 109.21 |
| FGFR1       | 94.80  |
| FGFR2       | 95.46  |
| FGFR3       | 96.13  |
| FGFR4       | 106.69 |
| FGR         | 53.38  |
| FLT1/VEGFR1 | 94.80  |
| FLT3        | 6.30   |
| FLT4/VEGFR3 | 93.14  |
| FMS         | 35.30  |

|            |        |
|------------|--------|
| FYN        | 32.85  |
| Haspin     | 10.57  |
| HCK        | 61.71  |
| HGK/MAP4K4 | 74.84  |
| HIPK1      | 87.41  |
| HIPK2      | 29.11  |
| HIPK3      | 54.22  |
| HIPK4      | 16.93  |
| IGF1R      | 98.04  |
| IKKa/CHUK  | 82.03  |
| IKKb/IKBKB | 104.82 |
| IKKe/IKBKE | 82.07  |
| JAK1       | 90.64  |
| JAK2       | 34.94  |
| JAK3       | 69.90  |
| JNK1       | 94.48  |
| JNK2       | 98.75  |
| JNK3       | 97.50  |
| KDR/VEGFR2 | 91.97  |
| LCK        | 10.38  |
| LKB1       | 99.02  |
| LYN        | 76.93  |
| MEK1       | 98.58  |
| MEK2       | 104.98 |



|                |        |
|----------------|--------|
| MRCKa/CDC42BPA | 100.20 |
| MRCKb/CDC42BPB | 93.29  |
| MST4           | 138.39 |
| MUSK           | 15.00  |
| NEK1           | 71.29  |
| P38a/MAPK14    | 96.48  |
| P38b/MAPK11    | 94.13  |
| P38d/MAPK13    | 102.65 |
| P38g           | 101.00 |
| p70S6K/RPS6KB1 | 100.59 |
| PAK4           | 79.72  |
| PDGFRa         | 77.52  |
| PDGFRb         | 66.17  |
| PIM1           | 1.97   |
| PIM2           | 29.60  |
| PKCa           | 74.12  |
| PKCb1          | 92.03  |
| PKCd           | 95.19  |
| PKCepsilon     | 79.55  |
| PKCeta         | 99.88  |
| PKCtheta       | 98.98  |
| PLK1           | 102.12 |
| PYK2           | 86.38  |
| RAF1           | 92.20  |

|           |        |
|-----------|--------|
| RET       | 77.23  |
| ROCK1     | 103.52 |
| RON/MST1R | 91.29  |
| ROS/ROS1  | 56.69  |
| SGK1      | 78.22  |
| SYK       | 88.74  |
| TGFBR2    | 61.98  |
| TIE2/TEK  | 99.58  |
| TNIK      | 75.04  |
| TRKA      | 16.07  |
| TRKB      | 6.63   |
| TRKC      | 3.84   |
| TYRO3/SKY | 94.45  |
| YES/YES1  | 23.76  |

\* Values represent the average of 2 separate experiments.

|   | <b>11b</b> |           |
|---|------------|-----------|
|   | kinase     | Activity* |
| 1 | PIM1       | 1.965154  |
| 2 | TRKC       | 3.840984  |
| 3 | FLT3       | 6.295302  |
| 4 | TRKB       | 6.632169  |
| 5 | LCK        | 10.37995  |

|    |                |          |
|----|----------------|----------|
| 6  | Haspin         | 10.57093 |
| 7  | MUSK           | 14.99514 |
| 8  | TRKA           | 16.06705 |
| 9  | HIPK4          | 16.9267  |
| 10 | YES/YES1       | 23.76084 |
| 11 | CK2a           | 25.47173 |
| 12 | HIPK2          | 29.10777 |
| 13 | PIM2           | 29.6005  |
| 14 | FYN            | 32.85065 |
| 15 | JAK2           | 34.93882 |
| 16 | FMS            | 35.29637 |
| 17 | c-Src          | 41.44842 |
| 18 | BRK            | 52.2481  |
| 19 | FGR            | 53.38278 |
| 20 | HIPK3          | 54.21787 |
| 21 | c-Kit          | 54.35329 |
| 22 | ROS/ROS1       | 56.68826 |
| 23 | DAPK1          | 57.4512  |
| 24 | HCK            | 61.7054  |
| 25 | TGFBR2         | 61.98027 |
| 26 | PDGFRb         | 66.17142 |
| 27 | AXL            | 67.48917 |
| 28 | JAK3           | 69.90114 |
| 29 | CDK9/cyclin T1 | 70.77933 |

|    |               |          |
|----|---------------|----------|
| 30 | NEK1          | 71.29039 |
| 31 | CDK1/cyclin B | 73.76878 |
| 32 | PKCa          | 74.12231 |
| 33 | HGK/MAP4K4    | 74.83763 |
| 34 | CDK2/cyclin A | 74.96454 |
| 35 | TNIK          | 75.03711 |
| 36 | ABL1          | 76.53915 |
| 37 | LYN           | 76.93333 |
| 38 | RET           | 77.23456 |
| 39 | PDGFRa        | 77.523   |
| 40 | SGK1          | 78.21783 |
| 41 | PKCepsilon    | 79.55311 |
| 42 | PAK4          | 79.71943 |
| 43 | FER           | 80.2534  |
| 44 | CDK7/cyclin H | 80.37326 |
| 45 | BTK           | 81.53723 |
| 46 | IKKa/CHUK     | 82.03436 |
| 47 | IKKe/IKBKE    | 82.06968 |
| 48 | ABL2/ARG      | 83.96575 |
| 49 | Aurora A      | 83.98188 |
| 50 | EEF2K         | 84.92741 |
| 51 | Aurora B      | 84.98927 |
| 52 | DNA-PK        | 85.70344 |
| 53 | PYK2          | 86.38275 |

|    |                |          |
|----|----------------|----------|
| 54 | CDK4/cyclin D1 | 87.00265 |
| 55 | HIPK1          | 87.40891 |
| 56 | CDK5/p25       | 87.58962 |
| 57 | SYK            | 88.74032 |
| 58 | COT1/MAP3K8    | 89.48868 |
| 59 | EPHA7          | 89.98776 |
| 60 | CK1epsilon     | 90.19615 |
| 61 | AKT2           | 90.30307 |
| 62 | EPHA1          | 90.62266 |
| 63 | JAK1           | 90.63747 |
| 64 | RON/MST1R      | 91.28522 |
| 65 | FAK/PTK2       | 91.47893 |
| 66 | EPHA8          | 91.49511 |
| 67 | CHK1           | 91.62749 |
| 68 | c-MET          | 91.71235 |
| 69 | AKT3           | 91.85688 |
| 70 | Aurora C       | 91.8998  |
| 71 | KDR/VEGFR2     | 91.96723 |
| 72 | PKCb1          | 92.03178 |
| 73 | RAF1           | 92.19887 |
| 74 | ERBB4/HER4     | 92.5531  |
| 75 | EPHB4          | 92.6608  |
| 76 | FLT4/VEGFR3    | 93.13995 |
| 77 | MRCKb/CDC42BPB | 93.28655 |

|     |                |          |
|-----|----------------|----------|
| 78  | P38b/MAPK11    | 94.13054 |
| 79  | TYRO3/SKY      | 94.45096 |
| 80  | JNK1           | 94.47617 |
| 81  | FGFR1          | 94.79572 |
| 82  | FLT1/VEGFR1    | 94.79602 |
| 83  | PKCd           | 95.19088 |
| 84  | AKT1           | 95.33915 |
| 85  | FGFR2          | 95.46037 |
| 86  | FGFR3          | 96.13037 |
| 87  | EPHB1          | 96.41357 |
| 88  | P38a/MAPK14    | 96.47615 |
| 89  | CTK/MATK       | 96.52623 |
| 90  | JNK3           | 97.49793 |
| 91  | CDK6/cyclin D1 | 97.79737 |
| 92  | EPHA4          | 98.00282 |
| 93  | IGF1R          | 98.03697 |
| 94  | MEK1           | 98.58226 |
| 95  | JNK2           | 98.75095 |
| 96  | PKCtheta       | 98.97511 |
| 97  | LKB1           | 99.02296 |
| 98  | TIE2/TEK       | 99.5798  |
| 99  | PKCeta         | 99.88336 |
| 100 | MRCKa/CDC42BPA | 100.1999 |
| 101 | p70S6K/RPS6KB1 | 100.588  |

|     |             |          |
|-----|-------------|----------|
| 102 | P38g        | 101.0034 |
| 103 | EGFR        | 101.0856 |
| 104 | CHK2        | 102.0755 |
| 105 | EPHA2       | 102.0937 |
| 106 | PLK1        | 102.1241 |
| 107 | P38d/MAPK13 | 102.6485 |
| 108 | EPHB2       | 103.0477 |
| 109 | ROCK1       | 103.5244 |
| 110 | ERBB2/HER2  | 103.9569 |
| 111 | EPHB3       | 104.6244 |
| 112 | IKKb/IKBKB  | 104.8158 |
| 113 | MEK2        | 104.9842 |
| 114 | FGFR4       | 106.6886 |
| 115 | EPHA5       | 107.8302 |
| 116 | EPHA3       | 108.2156 |
| 117 | FES/FPS     | 109.2117 |
| 118 | BRAF        | 110.2817 |
| 119 | MST4        | 138.3896 |

\* Values represent the average of 2 separate experiments.

Compound **11b** was tested against 4 PI3K isoforms.

Compound **11b** was tested in a 10-dose IC<sub>50</sub> with 3-fold serial dilution starting at 10 μM. Control Compound, PI-103, was tested in 10-dose IC<sub>50</sub> with 3-fold serial dilution starting at 10 μM. Reactions were carried out at 10 μM ATP. HTRF assay format was used for PI3Ks. Data pages include raw data, % Enzyme activity (relative to DMSO controls), and curve fits.

IC<sub>50</sub> Summary:

| Kinase:   | Compound ID IC <sub>50</sub> (nM) |               |
|-----------|-----------------------------------|---------------|
|           | <b>11b</b>                        | <b>PI-103</b> |
| PI3Kalpha | 146.80                            | 2.49          |
| PI3Kbeta  | 1048.00                           | 5.66          |
| PI3Kgamma | 66.75                             | 38.97         |
| PI3Kdelta | 356.90                            | 11.73         |



Supplementary material Figure 1.

Selected compounds inhibit BAD phosphorylation in bladder cancer cell lines.

RPMI-8226 cells treated with 1 $\mu$ M drug for 45 min

pBAD/total

normalized to NT

9276

9b

11a

9a

9358

11b

70%

30%

32%

28%

57%

23%

pBAD

Total BAD

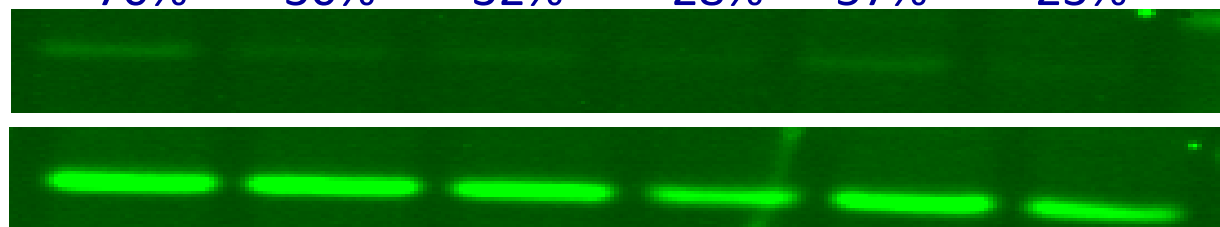

Supplementary material Figure 2A.

Compound **11b** inhibited and reduced the growth of UM-UC-3 cells in 2-dimensional colony formation assay.

### UM-UC-3 with compound **11b**.

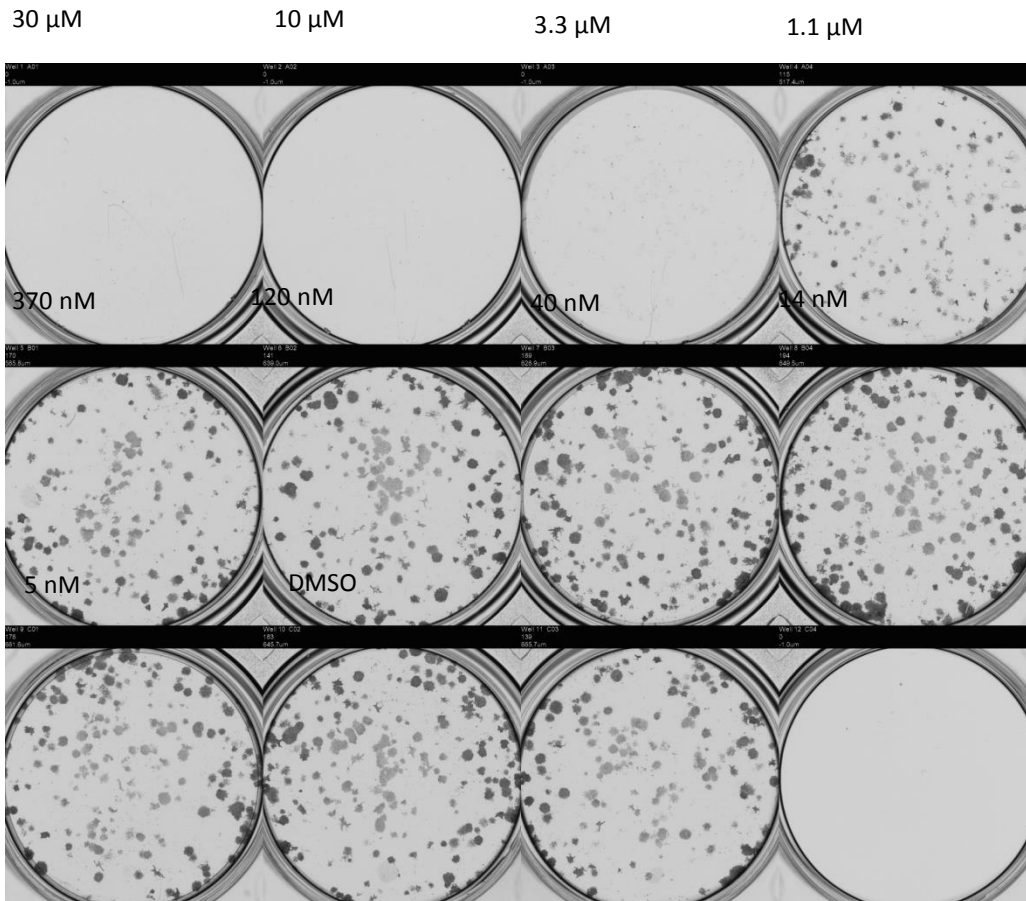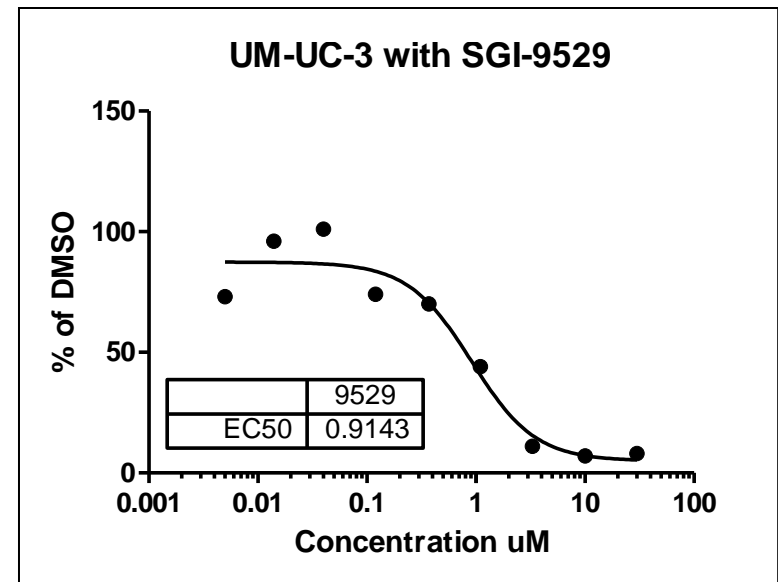

## Supplementary material Figure 2B.

Compound **11b** inhibited and reduced the growth of HSC3 cells in 2-dimensional colony formation assay.

HSC3 with compound 11b.

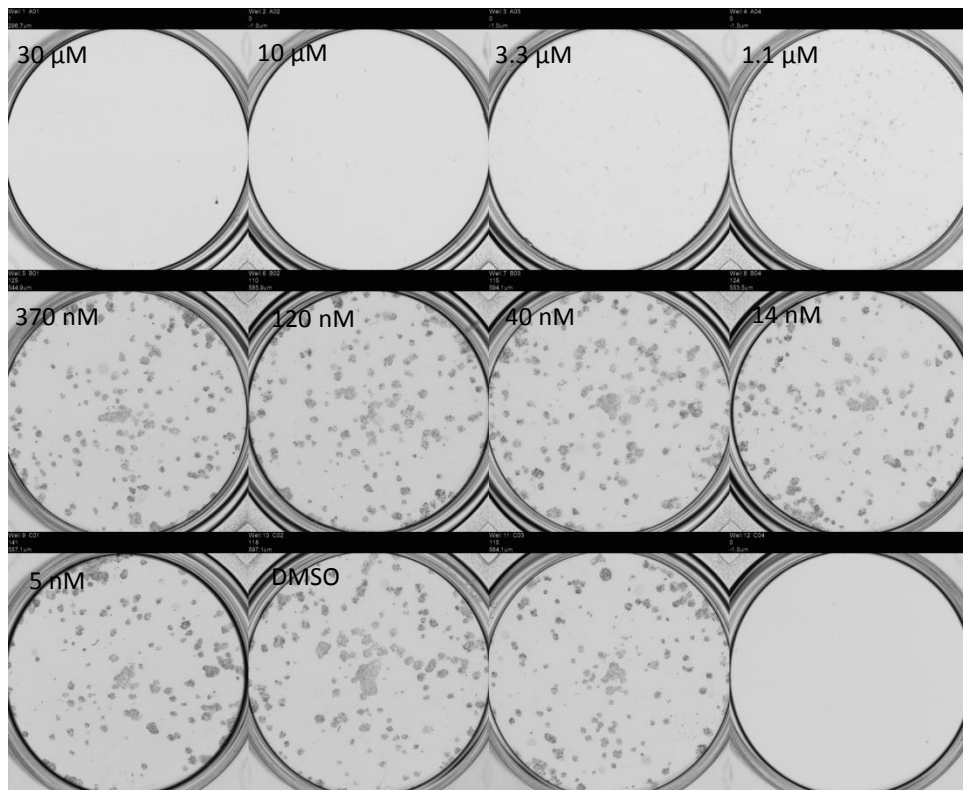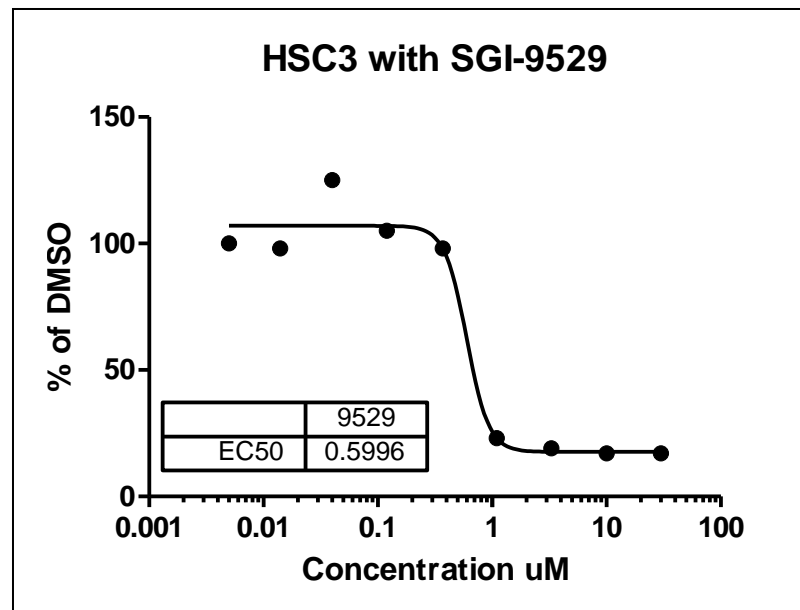

Supplement: ml500300c_si_001.pdf [file ml500300c_si_001.pdf]
